# Supplementary material
Source: MDPI journal article supplement (https://www.mdpi.com/1999-4907/13/8/1291)
Supplement: s1 [file s1]

# **Soil moisture control of NO turnover and N<sub>2</sub>O release in nitrogen-saturated subtropical forest soils**

Ronghua Kang <sup>1,2</sup>, Thomas Behrendt <sup>3\*</sup>, Jan Mulder <sup>2</sup> and Peter Dörsch <sup>2\*</sup>

<sup>1</sup>CAS Key Laboratory of Forest Ecology and Management, Institute of Applied Ecology, Chinese Academy of Sciences, Shenyang, 110016, China

<sup>2</sup>Faculty of Environmental Sciences and Natural Resource Management, Norwegian University of Life Sciences, Aas, Norway

<sup>3</sup>Department of Biogeochemical Processes, Max Planck Institute for Biogeochemistry, Jena, Germany

Corresponding authors: [tbehr@bgc-jena.mpg.de](mailto:tbehr@bgc-jena.mpg.de); [peter.doersch@nmbu.no](mailto:peter.doersch@nmbu.no)

## **Supplementary Materials**

Figures S1-S4

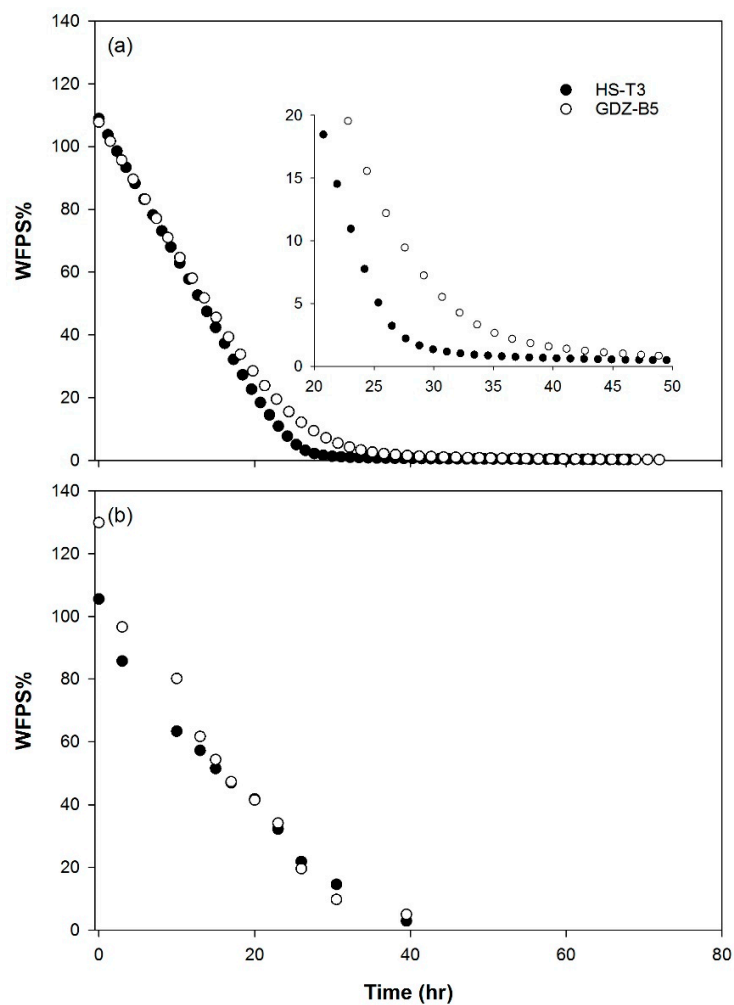

Figure S1. Dry-out curves at 30°C for soils HS-T3 (filled circles) and GDZ-B5 (open circles) in (a) the NO experiment conducted at MPI Mainz and (b) the N<sub>2</sub>O experiment conducted in Norway.

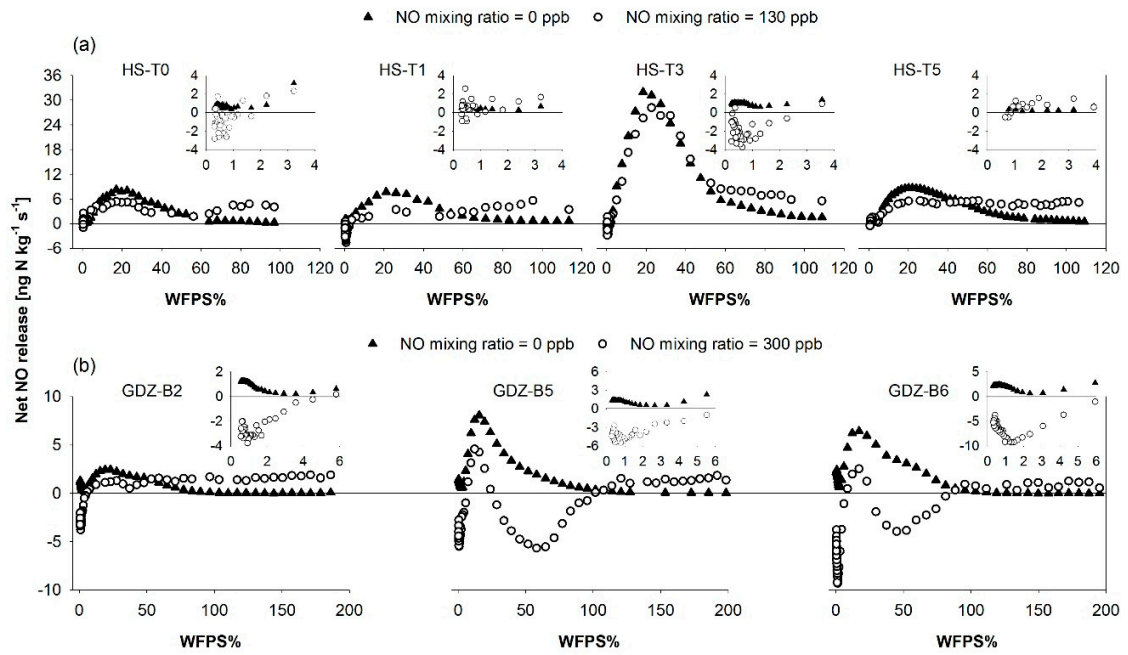

Figure S2. Net NO-N release rates in (a) HS-T0, HS-T1, HS-T3, HS-T5 and (b) GDZ-B2, GDZ-B5 and GDZ-B6 as a function of WFPS in the dry-out experiment with zero-NO flushing (filled triangles) and elevated NO flushing (at 130 ppb and 300 ppb in HS and GDZ soils, respectively; open circles). Inserts show NO release and uptake rates at WFPS < 6%. The temperature was 30°C. Note different scales of x and y-axes.

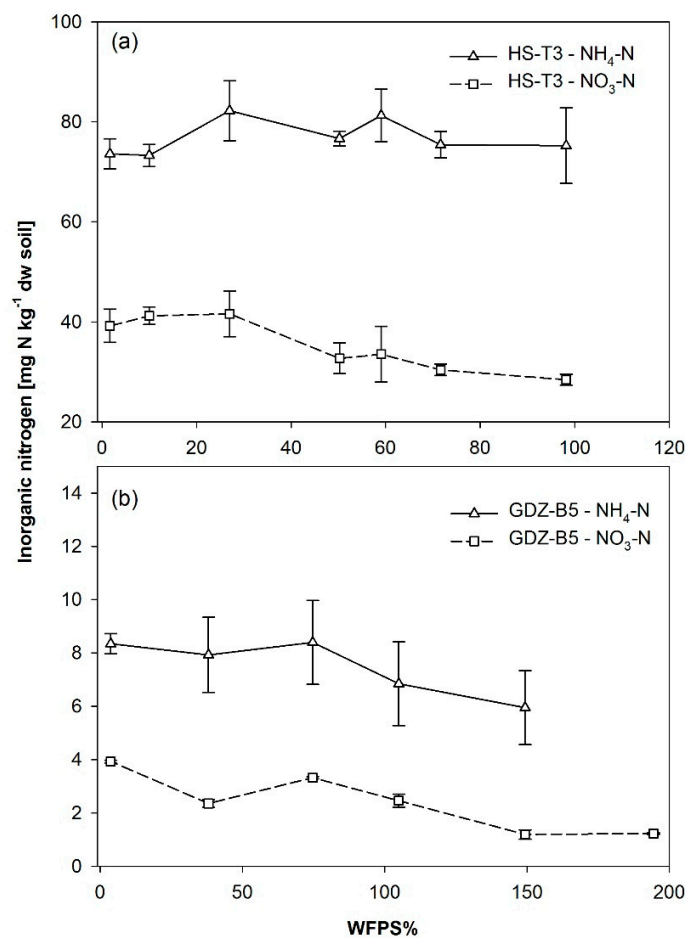

Figure S3. 2M KCl extractable NH<sub>4</sub><sup>+</sup> and NO<sub>3</sub><sup>-</sup> in the dry-out experiment with soils from (a) HS-T3 and (b) GDZ-B5. Values are means and standard deviations (n=3). Note different scales of x- and y-axes in (a) and (b).

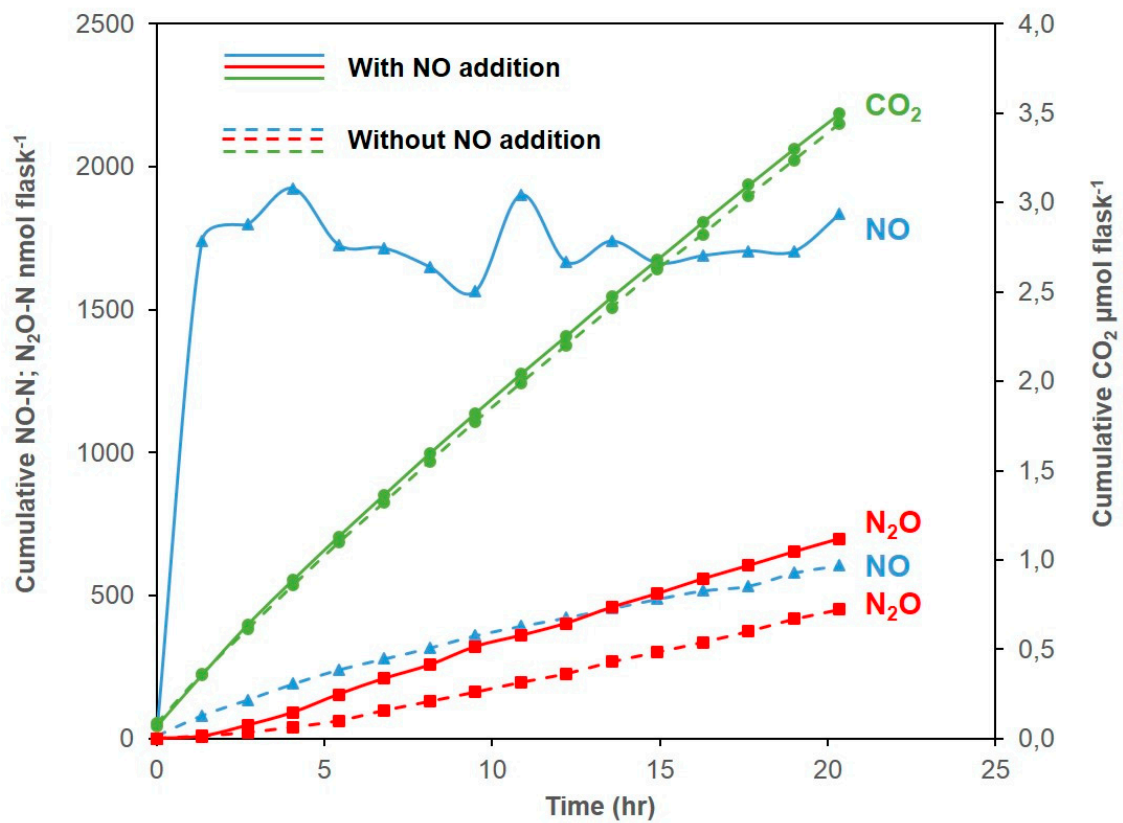

Figure S4. N<sub>2</sub>O-N, NO-N and CO<sub>2</sub>-C accumulation with and without spiking 10 g of moist mixed HS soil (60% WFPS) with 350 ppm NO. The soil was incubated anoxically in a crimp-sealed 120 ml serum bottle in a He-atmosphere. Solid lines indicate the treatment with NO addition, whereas dashed lines are the control without NO addition.
